# Supplementary material for: Admission Lipoprotein-Associated Phospholipase A2 Activity Is Not Associated with Long-Term Clinical Outcomes after ST-Segment Elevation Myocardial Infarction
Source: PLoS One. 2014 May 1;9(5):e96251. doi: 10.1371/journal.pone.0096251 (PMC4006846; doi:10.1371/journal.pone.0096251)
Supplement: Checklist S1 — STROBE Checklist. (DOC) [file pone.0096251.s001.doc]

STROBE Statement—Checklist of items that should be included in reports of ***cohort studies***

|  | Item No | Recommendation |
| --- | --- | --- |
| **Title and abstract** | 1 | (*a*) Indicate the study’s design with a commonly used term in the title or the abstract  *Prospective Cohort Study* |
| (*b*) Provide in the abstract an informative and balanced summary of what was done and what was found  *Done, submitted abstract* |
| Introduction | | |
| Background/rationale | 2 | Explain the scientific background and rationale for the investigation being reported  *Done, introduction* |
| Objectives | 3 | State specific objectives, including any prespecified hypotheses  *Done, introduction* |
| Methods | | |
| Study design | 4 | Present key elements of study design early in the paper  *Done, methods* |
| Setting | 5 | Describe the setting, locations, and relevant dates, including periods of recruitment, exposure, follow-up, and data collection  *methods-source population and procedure, data collection, and study population* |
| Participants | 6 | (*a*) Give the eligibility criteria, and the sources and methods of selection of participants. Describe methods of follow-up  *Methods-data collection, study population, and flow-chart* |
| (*b*)For matched studies, give matching criteria and number of exposed and unexposed  *na* |
| Variables | 7 | Clearly define all outcomes, exposures, predictors, potential confounders, and effect modifiers. Give diagnostic criteria, if applicable  *Methods-outcomes* |
| Data sources/ measurement | 8* | For each variable of interest, give sources of data and details of methods of assessment (measurement). Describe comparability of assessment methods if there is more than one group  *Methods-data collection* |
| Bias | 9 | Describe any efforts to address potential sources of bias  *Methods-data collection and limitations* |
| Study size | 10 | Explain how the study size was arrived at  *Methods-data collection* |
| Quantitative variables | 11 | Explain how quantitative variables were handled in the analyses. If applicable, describe which groupings were chosen and why  *Methods-statistics* |
| Statistical methods | 12 | (*a*) Describe all statistical methods, including those used to control for confounding  *Methods-statistics* |
| (*b*) Describe any methods used to examine subgroups and interactions  *Methods-statistics* |
| (*c*) Explain how missing data were addressed  *Methods-statistics* |
| (*d*) If applicable, explain how loss to follow-up was addressed |
| (*e*) Describe any sensitivity analyses |
| Results | | |
| Participants | 13* | (a) Report numbers of individuals at each stage of study—eg numbers potentially eligible, examined for eligibility, confirmed eligible, included in the study, completing follow-up, and analysed  *Results-patient characteristics* |
| (b) Give reasons for non-participation at each stage  *Results-patient characteristics* |
| (c) Consider use of a flow diagram  *Not applicable* |
| Descriptive data | 14* | (a) Give characteristics of study participants (eg demographic, clinical, social) and information on exposures and potential confounders  *Table 1* |
| (b) Indicate number of participants with missing data for each variable of interest  *Table 1* |
| (c) Summarise follow-up time (eg, average and total amount)  *Methods/results section* |
| Outcome data | 15* | Report numbers of outcome events or summary measures over time  *Table 3* |
| Main results | 16 | (*a*) Give unadjusted estimates and, if applicable, confounder-adjusted estimates and their precision (eg, 95% confidence interval). Make clear which confounders were adjusted for and why they were included  *Tables and results section* |
| (*b*) Report category boundaries when continuous variables were categorized  *Done, both in methods and results* |
| (*c*) If relevant, consider translating estimates of relative risk into absolute risk for a meaningful time period  *na* |
| Other analyses | 17 | Report other analyses done—eg analyses of subgroups and interactions, and sensitivity analyses  *Figure 1, table 3 and table 4* |
| Discussion | | |
| Key results | 18 | Summarise key results with reference to study objectives  *Discussion* |
| Limitations | 19 | Discuss limitations of the study, taking into account sources of potential bias or imprecision. Discuss both direction and magnitude of any potential bias  *Discussion - limitations* |
| Interpretation | 20 | Give a cautious overall interpretation of results considering objectives, limitations, multiplicity of analyses, results from similar studies, and other relevant evidence  *Discussion – Guidelines, Previous studies, and Pathophysiology of clinical outcomes* |
| Generalisability | 21 | Discuss the generalisability (external validity) of the study results  *Discussion - Conclusion* |
| Other information | | |
| Funding | 22 | Give the source of funding and the role of the funders for the present study and, if applicable, for the original study on which the present article is based  *NA, investigator initiated and funded. Sample kits provided, according to PLOSone instructions in* |
